# Supplementary material
Source: HighWire-hosted journal article supplement (http://erj.ersjournals.com/highwire/filestream/132447/field_highwire_adjunct_files/0/ERJ-00245-2016_Supplement.pdf)

## SUPPLEMENTARY FIGURES AND LEGENDS

**SUPPLEMENTARY FIGURE S1.** Correlation between plasma NOx value and age

( $r = 0.05$ ,  $p = 0.61$ ).

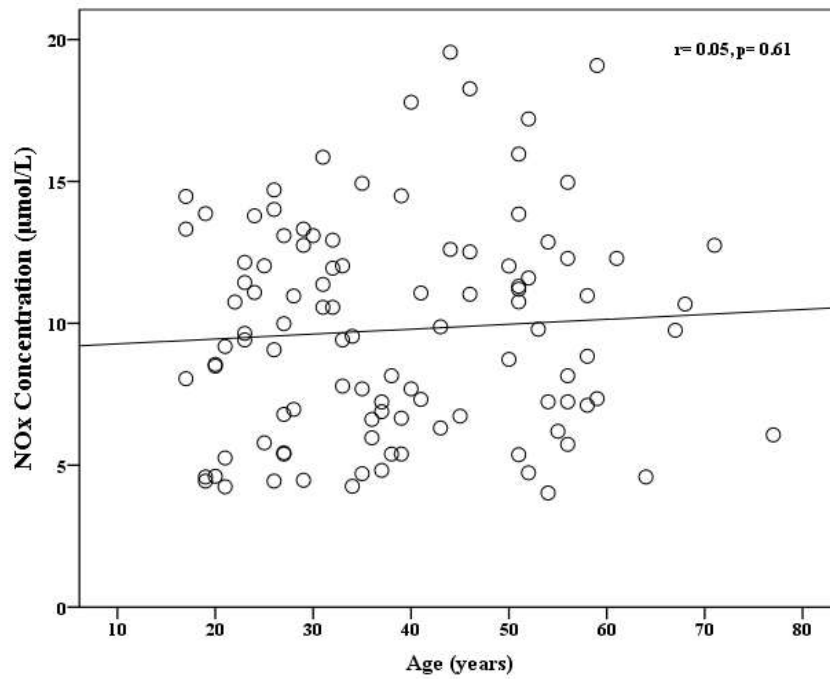

**SUPPLEMENTARY FIGURE S2.** Correlation between plasma NOx value and 6MWD

( $r = 0.16$ ,  $p = 0.20$ ).

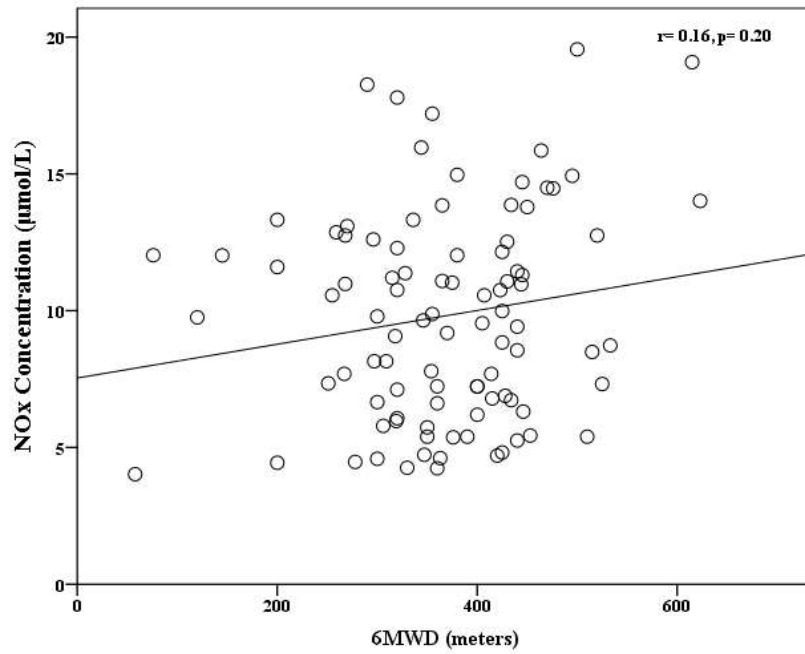

**SUPPLEMENTARY FIGURE S3.** Correlation between plasma NOx value and mRAP

( $r = -0.03$ ,  $p = 0.79$ ).

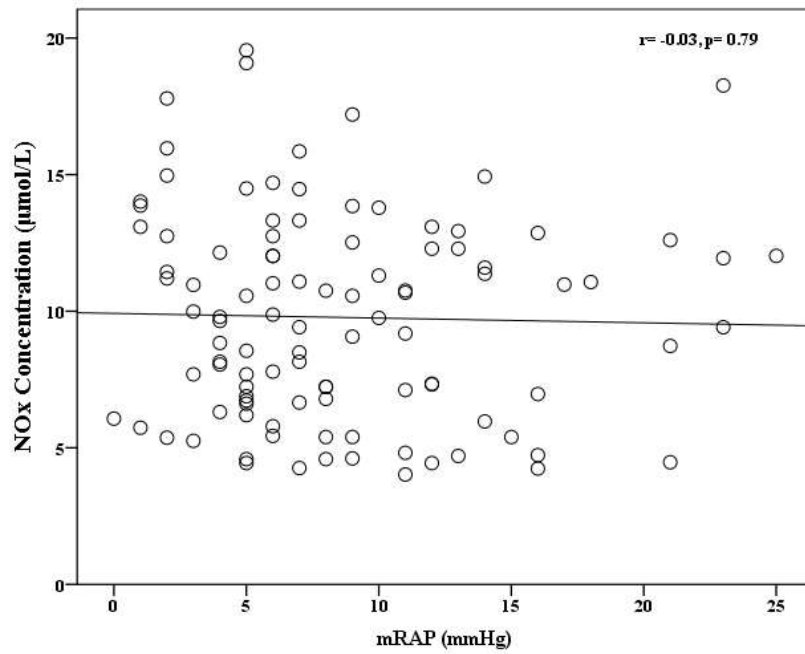

**SUPPLEMENTARY FIGURE S4.** Correlation between plasma NOx value and  $S_{VO_2}$

( $r = 0.17$ ,  $p = 0.95$ ).

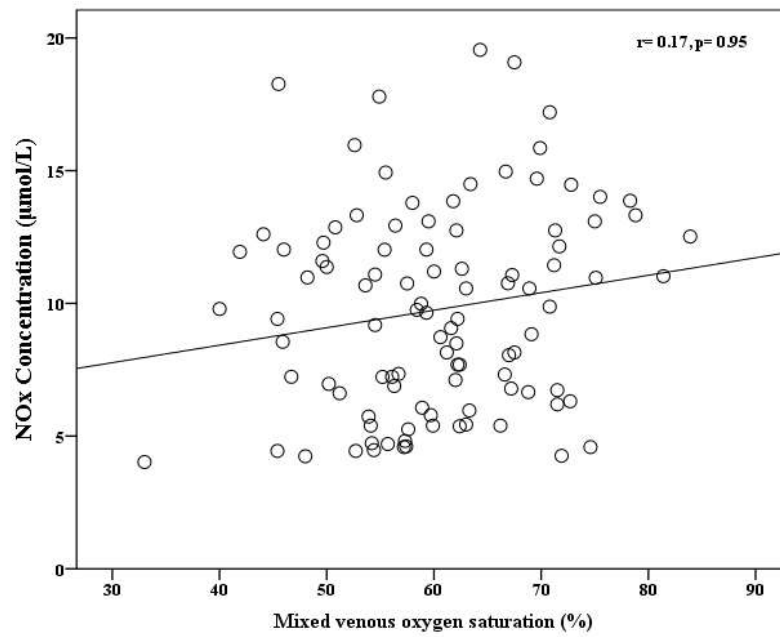

Supplement: ERJ-00245-2016_Supplement.pdf [file ERJ-00245-2016_Supplement.pdf]
